# Supplementary material for: Dynamic spin reordering in a hybrid layered ferrimagnet with intercalated biferrocenium radicals
Source: Royal Society of Chemistry journal article supplement (doi:10.1039/d4sc04722b), 2024-01-01
Supplement: d4sc04722b1.pdf [file d4sc04722b1.pdf]

## Supporting Information

# Dynamical Spin Reordering in a Hybrid Layered Ferrimagnet with Intercalated Biferrocenium Radicals

Qingxin Liu,<sup>a,b</sup> Wataru Kosaka,<sup>a,b</sup> Hitoshi Miyasaka<sup>\*a,b</sup>

<sup>a</sup> Institute for Materials Research, Tohoku University, 2-1-1 Katahira, Aoba-ku, Sendai 980-8577,  
Japan

<sup>b</sup> Department of Chemistry, Graduate School of Science, Tohoku University, 6-3 Arama-ki-Aza-  
Aoba, Aoba-ku, Sendai 980-8578, Japan

Corresponding author\*

Prof. Dr. Hitoshi Miyasaka

Institute for Materials Research

Tohoku University

2-1-1 Katahira, Aoba-ku, Sendai 980-8577, Japan

E-mail: [miyasaka@imr.tohoku.ac.jp](mailto:miyasaka@imr.tohoku.ac.jp)

E-mail: [hitoshi.miyasaka.e7@tohoku.ac.jp](mailto:hitoshi.miyasaka.e7@tohoku.ac.jp)

Tel: +81-22-215-2030

FAX: +81-22-215-2031

## Contents for SI

|                                                                                             |     |
|---------------------------------------------------------------------------------------------|-----|
| <b>Contents for SI</b> .....                                                                | S2  |
| <b>Experimental Section</b> .....                                                           | S3  |
| <b>Table S1.</b> Crystallographic data.....                                                 | S5  |
| <b>Table S2.</b> Bond distances and angles of hydrogen bond .....                           | S6  |
| <b>Table S3.</b> Selected bond lengths around metal centers.....                            | S7  |
| <b>The oxidation state of the [Ru<sub>2</sub>] unit in 1</b> .....                          | S7  |
| <b>Table S4.</b> Bond distances in the TCNQ moiety .....                                    | S8  |
| <b>Table S5.</b> Fe-Cp <sub>center</sub> distances .....                                    | S9  |
| <b>Table S6.</b> The estimation of overlap integral .....                                   | S10 |
| <b>Fig. S1</b> PXRD patterns .....                                                          | S11 |
| <b>Fig. S2</b> Structure of <b>2</b> .....                                                  | S12 |
| <b>Fig. S3</b> The TGA curves .....                                                         | S13 |
| <b>Fig. S4</b> Packing views projected perpendicular to the (1-11) plane .....              | S14 |
| <b>Fig. S5</b> Packing diagrams representing C-H···F type hydrogen bond .....               | S15 |
| <b>Fig. S6</b> Infrared and Raman spectra .....                                             | S17 |
| <b>Fig. S7</b> Electronic and spin states of assembly units.....                            | S18 |
| <b>Fig. S8</b> Magnetic field dependence of magnetization at 1.8 K of <b>2</b> .....        | S19 |
| <b>Fig. S9</b> FCM, ZFCM and RM curves of <b>1</b> at several field .....                   | S20 |
| <b>Relaxation time analysis of spin glass behavior</b> .....                                | S21 |
| <b>Fig. S10</b> Multiple peak fit results of $\chi''$ of <b>1</b> with Gauss function ..... | S22 |
| <b>Table S7</b> $\chi''$ peak positions of fit peaks after separation .....                 | S23 |
| <b>Stepwise relaxation behavior in 1</b> .....                                              | S24 |
| <b>Fig. S11</b> Spin alignments in D <sub>2</sub> A-type 2D antiferromagnetic phase .....   | S24 |
| <b>Fig. S12</b> Temperature dependence of $\chi''$ of <b>1</b> under DC fields .....        | S25 |
| <b>Reference</b> .....                                                                      | S26 |

## Experimental Section

### General procedures and materials.

All synthetic procedures were performed under an inert atmosphere using standard Schlenk-line techniques and a commercial glove box. Chemicals were of reagent grade and purchased from commercial sources. Solvents were dried using common drying agents and distilled under nitrogen before use. The starting materials TCNQF<sub>2</sub><sup>1</sup> and [Ru/Rh<sub>2</sub><sup>II,II</sup>(2,3,5,6-F<sub>4</sub>ArCO<sub>2</sub>)<sub>4</sub>(THF)<sub>2</sub>]<sup>2,3</sup> and biferrocene<sup>4</sup> were prepared following previously reported methods. Biferrocene was synthesized from bromoferrocene via Ullmann reactions<sup>5</sup> and further purified by column chromatography using *n*-hexane as the eluent.<sup>6</sup>

**Synthesis of (bifc)[{Ru<sub>2</sub>(2,3,5,6-F<sub>4</sub>ArCO<sub>2</sub>)<sub>4</sub>}<sub>2</sub>(TCNQF<sub>2</sub>)] (1).** A solution containing TCNQF<sub>2</sub> (2.40 mg, 0.01 mmol) and biferrocene (3.70 mg, 0.01 mmol) in dichloromethane (DCM) (20 mL) was prepared and carefully layered as a bottom layer in narrow-diameter glass tubes (inner diameter of 8 mm). Separately, [Ru<sub>2</sub>(2,3,5,6-F<sub>4</sub>ArCO<sub>2</sub>)<sub>4</sub>(THF)<sub>2</sub>] (22.4 mg, 0.02 mmol) dissolved in *p*-xylene (20 mL) was added in 2 mL portions onto the prepared bottom layer in each glass tube. The tubes were sealed and left undisturbed for one week to allow the crystallization of block-shaped black crystals of **1** (yield: 28%). Thermogravimetric analysis indicated that the crystals lost a small amount of surface solvent, but no solvent of crystallization was observed. Elemental analysis (calc.: C, 41.30; H, 1.10; N, 2.19%; found: C, 41.32; H, 1.28; N, 2.34%). IR (KBr):  $\nu_{(\text{C}\equiv\text{N})}$  2201 cm<sup>-1</sup>.

**Synthesis of (bifc)[{Rh<sub>2</sub>(2,3,5,6-F<sub>4</sub>ArCO<sub>2</sub>)<sub>4</sub>}<sub>2</sub>(TCNQF<sub>2</sub>)] (2).** The synthesis of the crystalline sample of **2** for SCXRD analysis was analogous to that of **1**, with the exception that [Ru<sub>2</sub>(2,3,5,6-F<sub>4</sub>ArCO<sub>2</sub>)<sub>4</sub>(THF)<sub>2</sub>] was mixed with [Rh<sub>2</sub>(2,3,5,6-F<sub>4</sub>ArCO<sub>2</sub>)<sub>4</sub>(THF)<sub>2</sub>] and *p*-xylene was mixed with DCE (yield: 22%). Elemental analysis (calc.: C, 41.18; H, 1.10; N, 2.18%; found: C, 41.31; H, 1.23; N, 2.35%). IR (KBr):  $\nu_{(\text{C}\equiv\text{N})}$  2213 and 2194 cm<sup>-1</sup>.

### Physical characterization.

IR spectra were recorded on a KBr pellet using a Jasco FT-IR 4200 spectrophotometer. Thermogravimetric analyses were conducted on a Shimadzu DTG-60H apparatus under an N<sub>2</sub> atmosphere in the temperature range from room temperature to 400 °C at a heating rate of 5 °C min<sup>-1</sup>. The powder XRD patterns were collected using a Rigaku Ultima IV diffractometer equipped with Cu K $\alpha$  radiation ( $\lambda = 1.5418 \text{ \AA}$ ). Powder reflection spectra were measured on pellets diluted with BaSO<sub>4</sub> using a Shimadzu UV-3150 spectrometer. Magnetic susceptibility measurements were performed with a Quantum Design SQUID magnetometer (MPMS-XL) in the temperature ranges of 1.8 to 300 K and in DC magnetic fields from -7 to 7 T. Polycrystalline samples embedded in liquid paraffin were also analyzed. The experimental data were corrected for contributions from the sample holder, liquid paraffin, and diamagnetic effects calculated using Pascal constants.<sup>7</sup>

### Crystallography.

Crystal data for **1** and **2** were collected using a CCD diffractometer (Rigaku Saturn724M+HyPix-6000HE) with multilayer mirror monochromated Mo K $\alpha$  radiation ( $\lambda = 0.71073$  Å). Single crystals with dimensions of  $0.08 \times 0.09 \times 0.1$  mm and  $0.02 \times 0.02 \times 0.025$  mm for **1** and **2**, respectively, were mounted on a thin Kapton film using Nujol and cooled to 102 K in an N<sub>2</sub> gas stream. Using Olex2,<sup>8</sup> the crystal structures were solved with the SHELXS<sup>9</sup> structure solution program using Direct Methods and refined using the SHELXL<sup>10</sup> refinement package through least-squares minimization. Anisotropic refinement of non-hydrogen atoms was performed using the full-matrix least-squares method on  $F^2$ . Non-hydrogen atoms were hydrogenated based on the theoretical background of structural chemistry, and hydrogen atoms were fixed in their positions on the carbon atoms. The crystallographic data, parameters for data collection, and specifics of the structure refinement are detailed in Table S1. These datasets have been deposited as CIFs at the Cambridge Data Centre as supplementary publication notes. CCDC 2371166 and 2371167 for **1** and **2**, respectively. Structural diagrams were generated using the Diamond software.<sup>11</sup>

**Table S1.** Crystallographic data for **1** and **2**.

| Compounds                                                                    | <b>1</b>                                                                                                       | <b>2</b>                                                                                                       |
|------------------------------------------------------------------------------|----------------------------------------------------------------------------------------------------------------|----------------------------------------------------------------------------------------------------------------|
| Empirical formula                                                            | C <sub>88</sub> H <sub>28</sub> F <sub>34</sub> Fe <sub>2</sub> N <sub>4</sub> O <sub>16</sub> Ru <sub>4</sub> | C <sub>88</sub> H <sub>28</sub> F <sub>34</sub> Fe <sub>2</sub> N <sub>4</sub> O <sub>16</sub> Rh <sub>4</sub> |
| Formula weight                                                               | 2559.12                                                                                                        | 2566.48                                                                                                        |
| Temperature / K                                                              | 102.1                                                                                                          | 102.1                                                                                                          |
| Crystal system                                                               | triclinic                                                                                                      | triclinic                                                                                                      |
| Space group                                                                  | <i>P</i> $\bar{1}$                                                                                             | <i>P</i> $\bar{1}$                                                                                             |
| <i>a</i> / Å                                                                 | 15.6986(3)                                                                                                     | 15.6132(4)                                                                                                     |
| <i>b</i> / Å                                                                 | 17.2101(3)                                                                                                     | 17.0211(4)                                                                                                     |
| <i>c</i> / Å                                                                 | 17.6280(3)                                                                                                     | 17.6801(5)                                                                                                     |
| $\alpha$ / °                                                                 | 76.436(2)                                                                                                      | 76.270(2)                                                                                                      |
| $\beta$ / °                                                                  | 71.465(2)                                                                                                      | 71.301(2)                                                                                                      |
| $\gamma$ / °                                                                 | 89.910(2)                                                                                                      | 89.251(2)                                                                                                      |
| Volume / Å <sup>3</sup>                                                      | 4375.87(15)                                                                                                    | 4313.2(2)                                                                                                      |
| <i>Z</i>                                                                     | 2                                                                                                              | 2                                                                                                              |
| $\rho_{\text{calc}}$ / g·cm <sup>-3</sup>                                    | 1.942                                                                                                          | 1.976                                                                                                          |
| $\mu$ / mm <sup>-1</sup>                                                     | 1.139                                                                                                          | 1.220                                                                                                          |
| <i>F</i> <sub>000</sub>                                                      | 2492.0                                                                                                         | 2500.0                                                                                                         |
| Crystal size / mm <sup>3</sup>                                               | 0.10 × 0.09 × 0.08                                                                                             | 0.03 × 0.02 × 0.02                                                                                             |
| Radiation                                                                    | Mo <i>K</i> α ( $\lambda$ = 0.71073)                                                                           | Mo <i>K</i> α ( $\lambda$ = 0.71073)                                                                           |
| 2 $\theta$ range for data collection / °                                     | 3.042 to 59.444                                                                                                | 3.056 to 51.362                                                                                                |
| Index ranges                                                                 | -21 ≤ <i>h</i> ≤ 21, -23 ≤ <i>k</i> ≤ 22,<br>-24 ≤ <i>l</i> ≤ 21                                               | -19 ≤ <i>h</i> ≤ 19, -20 ≤ <i>k</i> ≤ 20,<br>-21 ≤ <i>l</i> ≤ 21                                               |
| Reflections collected                                                        | 54325                                                                                                          | 46734                                                                                                          |
| Independent reflections                                                      | 20837 [ <i>R</i> <sub>int</sub> = 0.0518]                                                                      | 16279 [ <i>R</i> <sub>int</sub> = 0.0658]                                                                      |
| Data/restraints/parameters                                                   | 20837/12/1333                                                                                                  | 16279/18/1333                                                                                                  |
| Goodness-of-fit on <i>F</i> <sup>2</sup>                                     | 1.025                                                                                                          | 1.026                                                                                                          |
| Final <i>R</i> <sup>1-2</sup> indexes [ <i>I</i> >= 2 $\sigma$ ( <i>I</i> )] | <i>R</i> <sub>1</sub> = 0.0394, <i>wR</i> <sub>2</sub> = 0.0865                                                | <i>R</i> <sub>1</sub> = 0.0732, <i>wR</i> <sub>2</sub> = 0.1660                                                |
| Final <i>R</i> <sup>2</sup> indexes [all data]                               | <i>R</i> <sub>1</sub> = 0.0603, <i>wR</i> <sub>2</sub> = 0.0923                                                | <i>R</i> <sub>1</sub> = 0.1246, <i>wR</i> <sub>2</sub> = 0.1870                                                |
| CCDC No.                                                                     | 2371166                                                                                                        | 2371167                                                                                                        |

$$R_1 = \sum ||F_c| - |F_o|| / \sum |F_o|; wR_2 = [\sum w(F_o^2 - F_c^2)^2 / \sum w(F_o^2)^2]^{1/2}$$

**Table S2.** Bond distances (Å) and angles (°) of C–H···F–C hydrogen bond.

| C–H      | F                 | H···F<br>distance | C–H···F<br>angle | C–H     | F                  | H···F<br>distance | C–H···F<br>angle |
|----------|-------------------|-------------------|------------------|---------|--------------------|-------------------|------------------|
| <b>1</b> |                   |                   |                  |         |                    |                   |                  |
|          | bifc-1            |                   |                  |         | bifc-2             |                   |                  |
| C69–H69  | F33 <sup>i</sup>  | 2.541             | 168.1            | C79–H79 | F21 <sup>iii</sup> | 2.562             | 125.1            |
| C70–H70  | F28 <sup>i</sup>  | 2.763             | 130.9            | C80–H80 | F20 <sup>iii</sup> | 2.742             | 131.7            |
|          | F9 <sup>ii</sup>  | 2.800             | 116.9            |         | F26                | 2.880             | 162.8            |
|          | F10 <sup>ii</sup> | 2.870             | 168.9            |         | F25                | 2.874             | 109.9            |
|          | F27 <sup>i</sup>  | 3.034             | 117.5            |         | C81–H81            | F32 <sup>iv</sup> | 2.919            |
| C71–H71  | F9 <sup>ii</sup>  | 2.826             | 115.8            |         | F25                | 2.714             | 115.7            |
| C72–H72  | F33               | 3.094             | 158.0            | C82–H82 | F31 <sup>iv</sup>  | 2.402             | 147.1            |
| C74–H74  | F27 <sup>i</sup>  | 2.723             | 134.8            | C83–H83 | F34 <sup>iii</sup> | 2.356             | 151.8            |
| C75–H75  | F13               | 3.033             | 108.9            | C85–H85 | F25                | 3.085             | 117.0            |
| C76–H76  | F13               | 2.688             | 123.23           | C86–H86 | F11 <sup>iii</sup> | 2.551             | 147.3            |
|          | F14               | 2.750             | 115.1            |         | F12 <sup>iii</sup> | 2.856             | 152.6            |
|          | F34               | 3.009             | 173.4            |         | C88–H88            | F12               | 2.918            |
| C77–H77  | F29               | 2.686             | 126.2            |         |                    |                   |                  |
| C78–H78  | F29               | 3.055             | 111.4            |         |                    |                   |                  |
|          | F30               | 2.529             | 166.6            |         |                    |                   |                  |
| <b>2</b> |                   |                   |                  |         |                    |                   |                  |
|          | bifc-1            |                   |                  |         | bifc-2             |                   |                  |
| C69–H69  | F33 <sup>i</sup>  | 2.554             | 170.4            | C79–H79 | F21 <sup>iii</sup> | 2.575             | 126.9            |
| C70–H70  | F28 <sup>i</sup>  | 2.752             | 131.7            | C80–H80 | F20 <sup>iii</sup> | 2.750             | 130.6            |
|          | F9 <sup>ii</sup>  | 2.832             | 116.7            |         | F26                | 2.809             | 162.6            |
|          | F10 <sup>ii</sup> | 2.845             | 167.6            |         | F25                | 2.915             | 109.2            |
|          | F27 <sup>i</sup>  | 3.143             | 115.9            |         | C81–H81            | F32 <sup>iv</sup> | 2.868            |
| C71–H71  | F9 <sup>ii</sup>  | 2.818             | 117.0            |         | F25                | 2.727             | 115.8            |
| C72–H72  | F33               | 3.029             | 159.9            | C82–H82 | F31 <sup>iv</sup>  | 2.402             | 147.1            |
| C74–H74  | F27 <sup>i</sup>  | 2.639             | 136.3            | C83–H83 | F34 <sup>iii</sup> | 2.325             | 149.3            |
| C75–H75  | F13               | 3.0729            | 108.7            | C85–H85 | F25                | 2.988             | 119.4            |
| C76–H76  | F13               | 2.732             | 123.7            | C86–H86 | F11 <sup>iii</sup> | 2.520             | 148.9            |
|          | F14               | 2.724             | 116.4            |         | F12 <sup>iii</sup> | 2.837             | 150.2            |
|          | F34               | 3.027             | 174.3            |         | C88–H88            | F12               | 2.907            |
| C77–H77  | F29               | 2.710             | 124.1            |         |                    |                   |                  |
| C78–H78  | F29               | 2.957             | 114.9            |         |                    |                   |                  |
|          | F30               | 2.538             | 170.5            |         |                    |                   |                  |

The symmetry operations: (i)  $-x + 1, -y, -z + 2$ , (ii)  $-x + 1, -y, -z + 1$ , (iii)  $-x + 1, -y + 1, -z + 1$ , (iv)  $-x + 1, -y + 1, -z + 2$ .

**Table S3.** Selected bond lengths (Å) around metal centers for **1** and **2**.

|                     | <b>1</b>   | <b>2</b>   |
|---------------------|------------|------------|
| M1–O1               | 2.0629(19) | 2.033(5)   |
| M1–O2 <sup>a</sup>  | 2.0781(19) | 2.048(5)   |
| M1–O3               | 2.0714(19) | 2.035(6)   |
| M1–O4 <sup>a</sup>  | 2.0770(19) | 2.045(5)   |
| M2–O5               | 2.069(2)   | 2.033(5)   |
| M2–O6 <sup>b</sup>  | 2.072(2)   | 2.044(6)   |
| M2–O7               | 2.0687(18) | 2.043(4)   |
| M2–O8 <sup>b</sup>  | 2.0780(18) | 2.037(4)   |
| M3–O9               | 2.0657(18) | 2.042(5)   |
| M3–O10 <sup>c</sup> | 2.0727(3)  | 2.028(5)   |
| M3–O11              | 2.0724(18) | 2.030(5)   |
| M3–O12 <sup>c</sup> | 2.0749(18) | 2.033(5)   |
| M4–O13              | 2.0766(19) | 2.040(4)   |
| M4–O14 <sup>d</sup> | 2.0603(19) | 2.034(4)   |
| M4–O15              | 2.0676(19) | 2.029(5)   |
| M4–O16 <sup>d</sup> | 2.0606(19) | 2.021(5)   |
| M1–N1               | 2.289(2)   | 2.213(5)   |
| M2–N2               | 2.252(2)   | 2.188(6)   |
| M3–N3               | 2.265(2)   | 2.192(5)   |
| M4–N4               | 2.274(2)   | 2.212(6)   |
| M1–M1 <sup>a</sup>  | 2.2904(4)  | 2.4063(10) |
| M2–M2 <sup>b</sup>  | 2.2817(4)  | 2.3940(10) |
| M3–M3 <sup>c</sup>  | 2.2913(4)  | 2.4027(9)  |
| M4–M4 <sup>d</sup>  | 2.2897(4)  | 2.4041(10) |

Symmetry codes: <sup>a</sup>  $-x, -y, -z + 2$ , <sup>b</sup>  $-x + 1, -y, -z + 1$ , <sup>c</sup>  $-x + 2, -y + 1, -z + 1$ , <sup>d</sup>  $-x + 1, -y + 1, -z + 2$ .

**The oxidation state of the [Ru<sub>2</sub>] unit in 1.** The oxidation state of [Ru<sub>2</sub>] unit can be known from the Ru–O<sub>eq</sub> length (O<sub>eq</sub> = equatorial oxygen atoms), which is quite sensitive to the oxidation state of the [Ru<sub>2</sub>] unit and to be 2.06–2.07 Å for [Ru<sub>2</sub><sup>II,II</sup>] and 2.02–2.03 Å for [Ru<sub>2</sub><sup>II,III</sup>]<sup>+</sup>.<sup>12,13</sup> The average Ru–O<sub>eq</sub> length of **1** is 2.0724(10), 2.0721(9), 2.0714(9), and 2.0663(10) Å for [Ru(1)<sub>2</sub>], [Ru(2)<sub>2</sub>], [Ru(3)<sub>2</sub>] and [Ru(4)<sub>2</sub>] unit, respectively, indicating that the all [Ru<sub>2</sub>] units in **1** is [Ru<sub>2</sub><sup>II,II</sup>].

**Table S4.** Bond distances in the TCNQ moiety and degree of charge transfer ( $\rho$ ) estimated from the Kistenmacher relationship.<sup>14</sup>

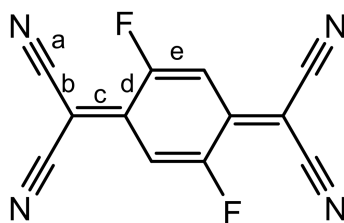

| Compound             | charge      | <i>a</i>    | <i>b</i>    | <i>c</i>    | <i>d</i>    | <i>e</i> | $\rho$    |
|----------------------|-------------|-------------|-------------|-------------|-------------|----------|-----------|
| TCNQ <sup>15</sup>   | 0           | 1.140(1)    | 1.441(1)    | 1.374(3)    | 1.448(4)    | 1.346(3) | 0 (fix)   |
| RbTCNQ <sup>16</sup> | -1          | 1.153(7)    | 1.416(8)    | 1.420(1)    | 1.423(3)    | 1.373(1) | -1 (fix)  |
| <b>1</b>             |             | 1.149(3)    | 1.418(4)    | 1.424(4)    | 1.411(4)    | 1.363(4) |           |
|                      |             | 1.148(3)    | 1.412(4)    |             | 1.418(4)    |          |           |
|                      |             | 1.150(3)    | 1.420(4)    |             | 1.418(3)    | 1.352(4) |           |
|                      |             | 1.143(3)    | 1.421(4)    | 1.426(4)    | 1.414(4)    |          | -1.12(5)  |
|                      |             | Av.         | Av.         | Av.         | Av.         | Av.      |           |
| <b>2</b>             |             | 1.1475(15)  | 1.418(2)    | 1.425(3)    | 1.4157(18)  | 1.358(3) |           |
|                      |             | 1.135(8)    | 1.414(9)    |             | 1.427(9)    |          |           |
|                      |             | 1.127(8)    | 1.426(9)    | 1.412(9)    | 1.412(9)    | 1.354(9) |           |
|                      |             | 1.141(8)    | 1.425(9)    |             | 1.430(9)    |          |           |
|                      |             | 1.130(8)    | 1.420(9)    | 1.411(8)    | 1.415(9)    | 1.348(9) | -0.86(10) |
|                      | Av 1.133(4) | Av 1.421(5) | Av 1.411(6) | Av 1.421(5) | Av 1.351(6) |          |           |



**Table S5.** Fe-Cp<sub>center</sub> distances and the electronic states of biferrocene in **1** and **2**.

| Compounds | Fe site | Fe-Cp <sub>center</sub> / Å | Electronic state                                                                               |
|-----------|---------|-----------------------------|------------------------------------------------------------------------------------------------|
| <b>1</b>  | Fe1     | 1.6698(16)                  | Bifc <sup>+1</sup><br>(Fe <sup>II</sup> -Fe <sup>III</sup> ) <sup>+</sup><br>valence-detrapped |
|           |         | 1.6946(16)                  |                                                                                                |
|           |         | Av. 1.6822(11)              |                                                                                                |
|           | Fe2     | 1.6820(16)                  |                                                                                                |
|           |         | 1.6629(18)                  |                                                                                                |
|           |         | Av. 1.6736(12)              |                                                                                                |
| <b>2</b>  | Fe1     | 1.674(5)                    | Bifc <sup>+1</sup><br>(Fe <sup>II</sup> -Fe <sup>III</sup> ) <sup>+</sup><br>valence-detrapped |
|           |         | 1.692(6)                    |                                                                                                |
|           |         | Av 1.681(4)                 |                                                                                                |
|           | Fe2     | 1.671(5)                    |                                                                                                |
|           |         | 1.655(5)                    |                                                                                                |
|           |         | Av 1.663(4)                 |                                                                                                |

**Table S6.** The estimation of the overlap integral.

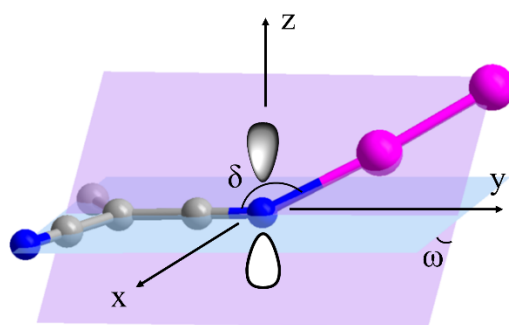

| Compounds                 | Asymmetric unit | $\delta / ^\circ$ <sup>a</sup> | $\omega / ^\circ$ <sup>b</sup> | $A_\sigma$ <sup>c</sup> | $A_\pi$ <sup>d</sup> | $T_c / \text{K}$ |
|---------------------------|-----------------|--------------------------------|--------------------------------|-------------------------|----------------------|------------------|
| <b>Ref. 1<sup>e</sup></b> | Ru1             | 149.3                          | 38.0                           | 0.0991                  | 0.9492               | 82               |
|                           | Ru2             | 164.0                          | 18.1                           | 0.0073                  | 0.9963               |                  |
|                           | average         | 156.6                          | 28.1                           | 0.0348                  | 0.9824               |                  |
| <b>Ref. 2<sup>e</sup></b> | Ru1             | 152.0                          | 37.4                           | 0.0814                  | 0.9584               | 88               |
|                           | Ru2             | 165.4                          | 17.3                           | 0.0056                  | 0.9972               |                  |
|                           | average         | 158.7                          | 27.3                           | 0.0278                  | 0.9860               |                  |
| <b>Ref. 3<sup>e</sup></b> | Ru1             | 149.8                          | 37.2                           | 0.0929                  | 0.9524               | 89               |
|                           | Ru2             | 163.0                          | 18.2                           | 0.0083                  | 0.9958               |                  |
|                           | average         | 156.4                          | 27.7                           | 0.0347                  | 0.9825               |                  |
| <b>1</b>                  | Ru1             | 157.6                          | 4.6                            | 0.0009                  | 0.9995               | 105              |
|                           | Ru2             | 156.3                          | 20.4                           | 0.0197                  | 0.9901               |                  |
|                           | Ru3             | 152.5                          | 13.8                           | 0.0122                  | 0.9939               |                  |
|                           | Ru4             | 151.9                          | 7.7                            | 0.0040                  | 0.9980               |                  |
|                           | average         | 154.6                          | 11.6                           | 0.0075                  | 0.9965               |                  |

<sup>a</sup>  $\angle \text{Ru-N-C}$ ; <sup>b</sup> Dihedral angle between two least-square plane formed by (Ru–Ru–N≡C–C) and (C–C–(C≡N)<sub>2</sub>); <sup>c</sup>  $A_\sigma = (\sin\delta \cdot \sin\omega)^2$ ; <sup>d</sup>  $A_\pi = \{1 - (\sin\delta \cdot \sin\omega)^2\}^{0.5}$ ; <sup>e</sup> **Ref. 1-3** are reported compound (FeCp\*<sub>2</sub>)[Ru<sup>II,II</sup>(2,3,5,6-F<sub>4</sub>ArCO<sub>2</sub>)<sub>4</sub>]<sub>2</sub>(TCNQ)·2DCE, (CoCp\*<sub>2</sub>)[Ru<sup>II,II</sup>(2,3,5,6-F<sub>4</sub>ArCO<sub>2</sub>)<sub>4</sub>]<sub>2</sub>(TCNQ)·2DCE and (CrCp\*<sub>2</sub>)[Ru<sup>II,II</sup>(2,3,5,6-F<sub>4</sub>ArCO<sub>2</sub>)<sub>4</sub>]<sub>2</sub>(TCNQ)·2DCE, respectively.<sup>18,19</sup>

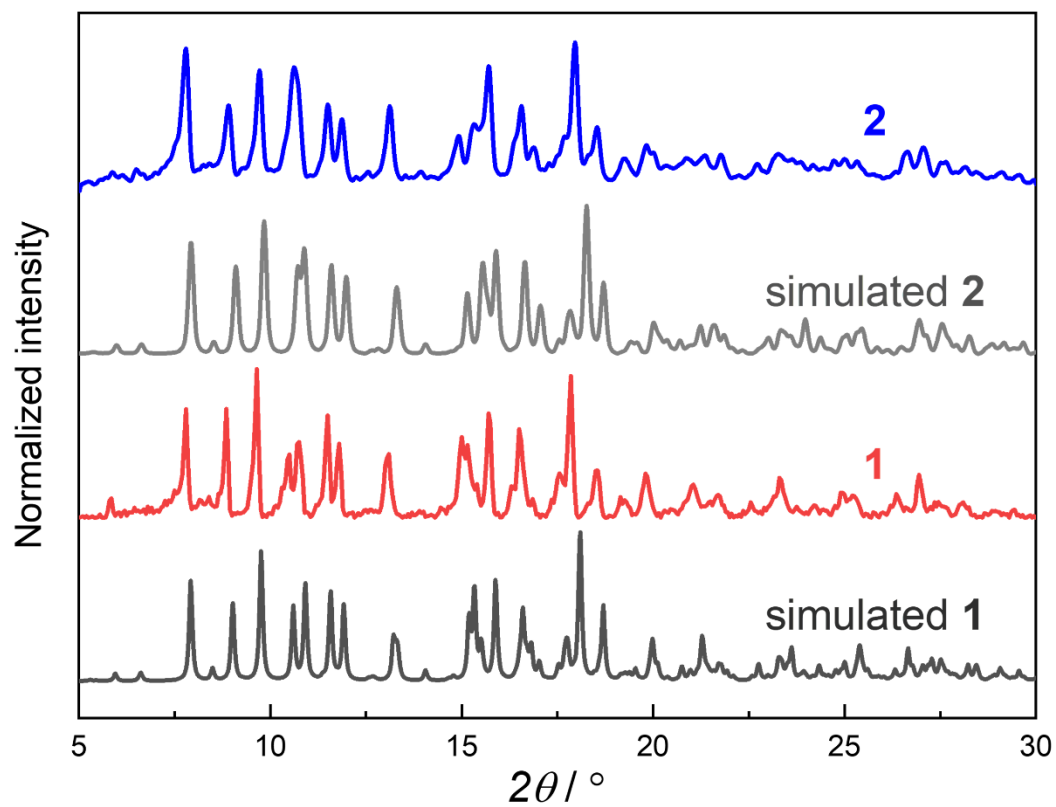

**Figure S1.** Experimental (colored) and simulated (black and gray) PXR D patterns of **1** and **2** at room temperature.

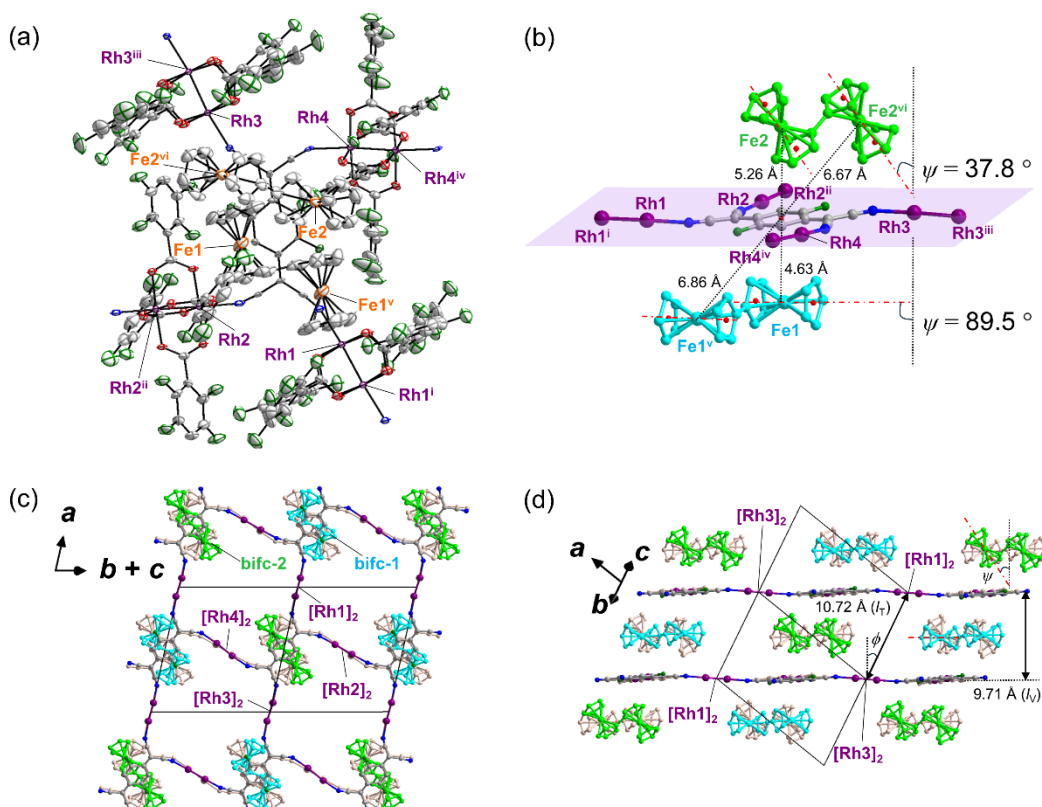

**Figure S2.** Structure of **2**. (a) Thermal ellipsoid plots (using 50% probability ellipsoids) of the asymmetric unit, in which hydrogen atoms are omitted for clarity, and O, C, N, F, Fe, and Rh atoms are represented in red, gray, blue, green, orange, and violet, respectively. The symmetry operations are (i)  $-x, -y, -z + 2$ , (ii)  $-x + 1, -y, -z + 1$ , (iii)  $-x + 2, -y + 1, -z + 1$ , (iv)  $-x + 1, -y + 1, -z + 2$ , (v)  $-x + 1, -y, -z + 2$ , (vi)  $1-x, 1-y, 1-z$ . (b) Packing diagrams focused on the location of bific. Packing views along  $[01\bar{1}]$  (c) and  $[011]$  (d) direction. Hydrogen atoms and 2,3,5,6-F<sub>4</sub>ArCO<sub>2</sub><sup>-</sup> ligands around the Rh centers are omitted for clarity. Only the forefront subunits are depicted in color, while others are colored in pale brown. The atomic colors are the same as those in panel (a) except for bific; bific-1 and bific-2 are colored in cyan and yellow-green, respectively. The red dash-dot line in panel (b) and (d) represents the main axis of bific. The purple plane in panel (b) represents the (1-11) D<sub>2</sub>A layer.

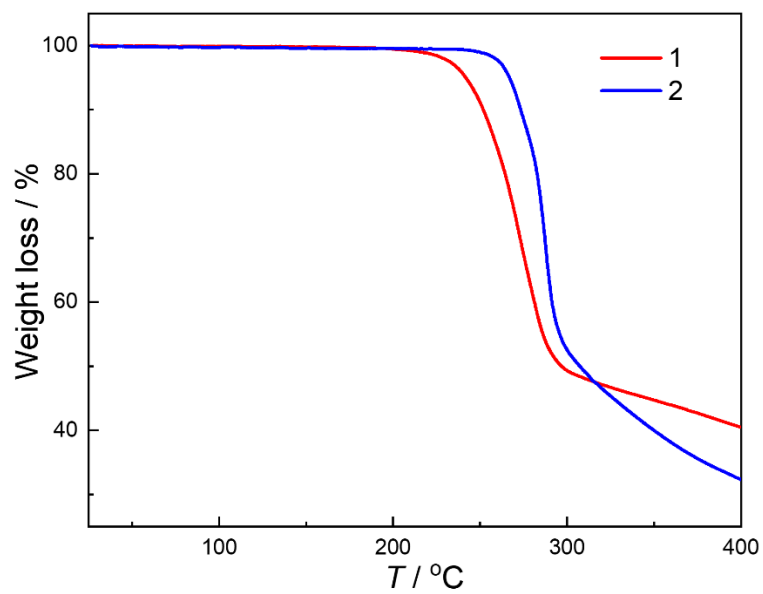

**Figure S3.** The TGA curves of **1** and **2** with a heating rate of  $5\text{ °C}/\text{min}^{-1}$  under  $\text{N}_2$  flow.

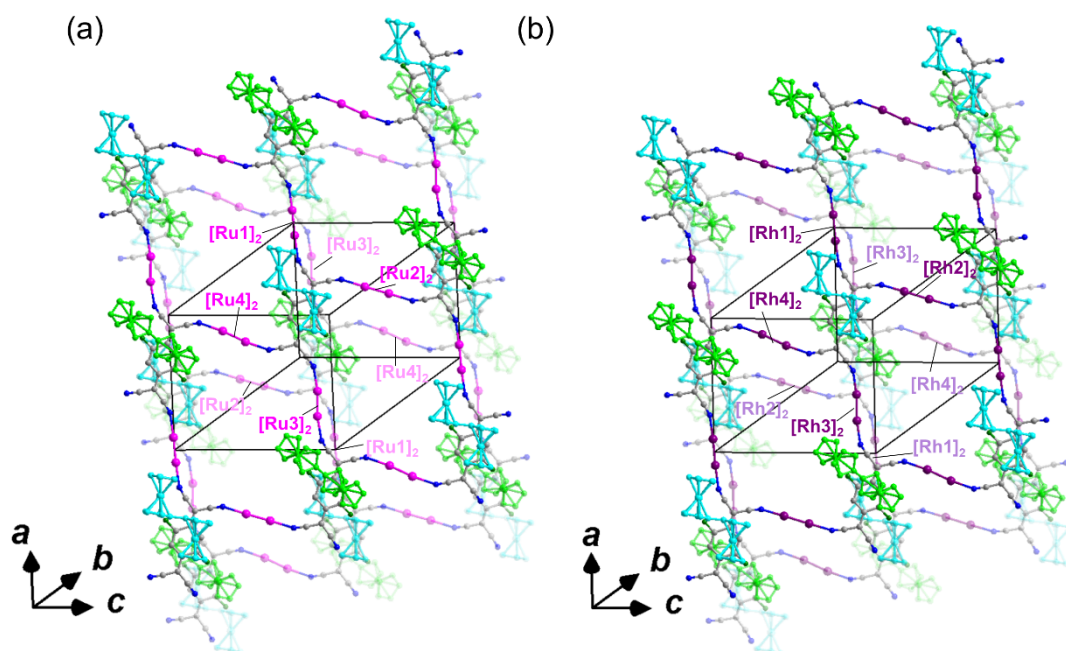

**Figure S4.** Packing views of **1** (a) and **2** (b) projected perpendicular to the (1-11) plane, in which hydrogen atoms and 2,3,5,6-F<sub>4</sub>ArCO<sub>2</sub><sup>-</sup> ligands around the Ru/Rh centers are omitted for clarity, and C, N, Ru and Rh atoms are represented in gray, blue, purple, and violet, respectively. Subunits bific-1 and bific-2 are colored in cyan and yellow-green, respectively.

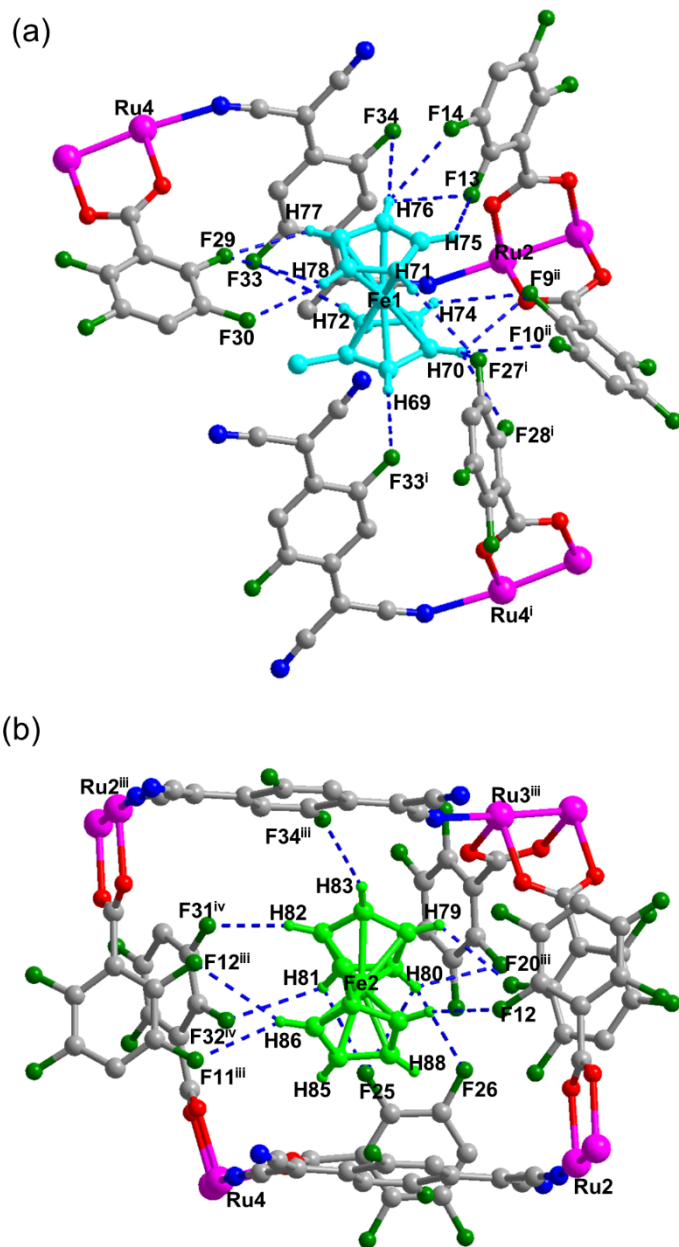

**Figure S5.** Packing diagrams of **1** representing C–H···F type hydrogen bond around bifc-1 (a) and bifc-2 (b). The symmetry operations are (i)  $-x, -y, -z + 2$ , (ii)  $-x + 1, -y, -z + 1$ , (iii)  $-x + 2, -y + 1, -z + 1$ , (iv)  $-x + 1, -y + 1, -z + 2$ .

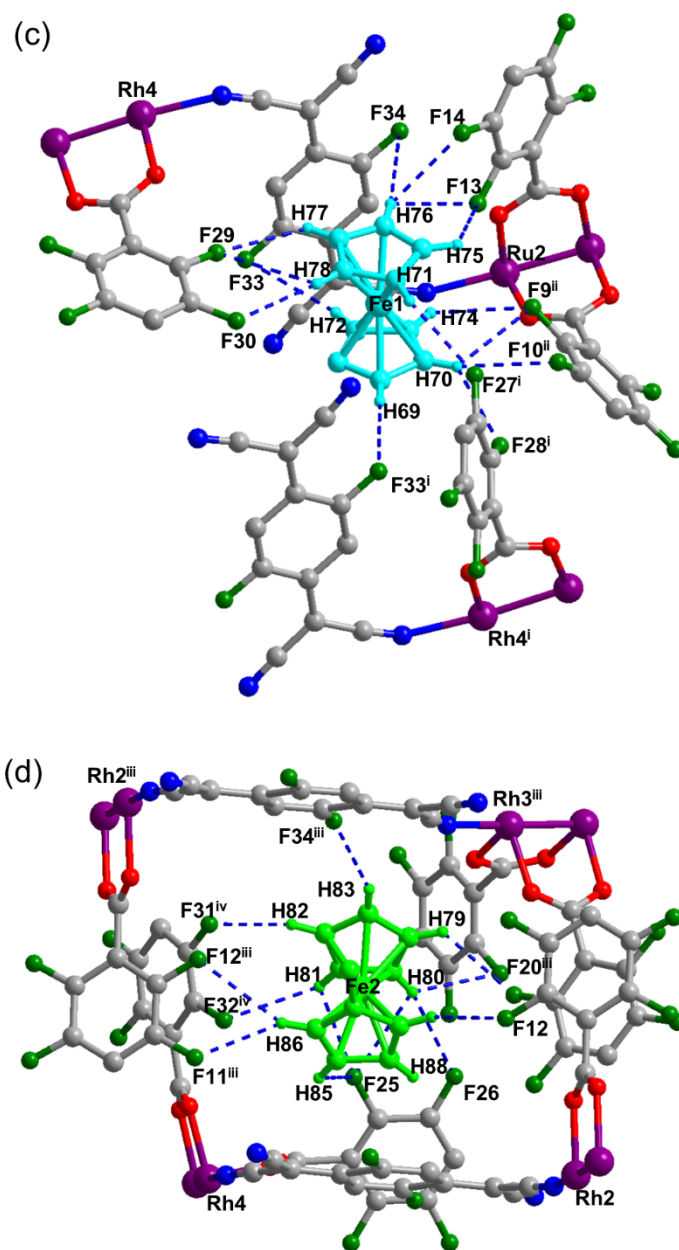

**Figure S5 (continue).** Packing diagrams of **2** representing C–H···F type hydrogen bond around bifc-1 (c) and bifc-2 (d). The symmetry operations are (i)  $-x, -y, -z + 2$ , (ii)  $-x + 1, -y, -z + 1$ , (iii)  $-x + 2, -y + 1, -z + 1$ , (iv)  $-x + 1, -y + 1, -z + 2$ .



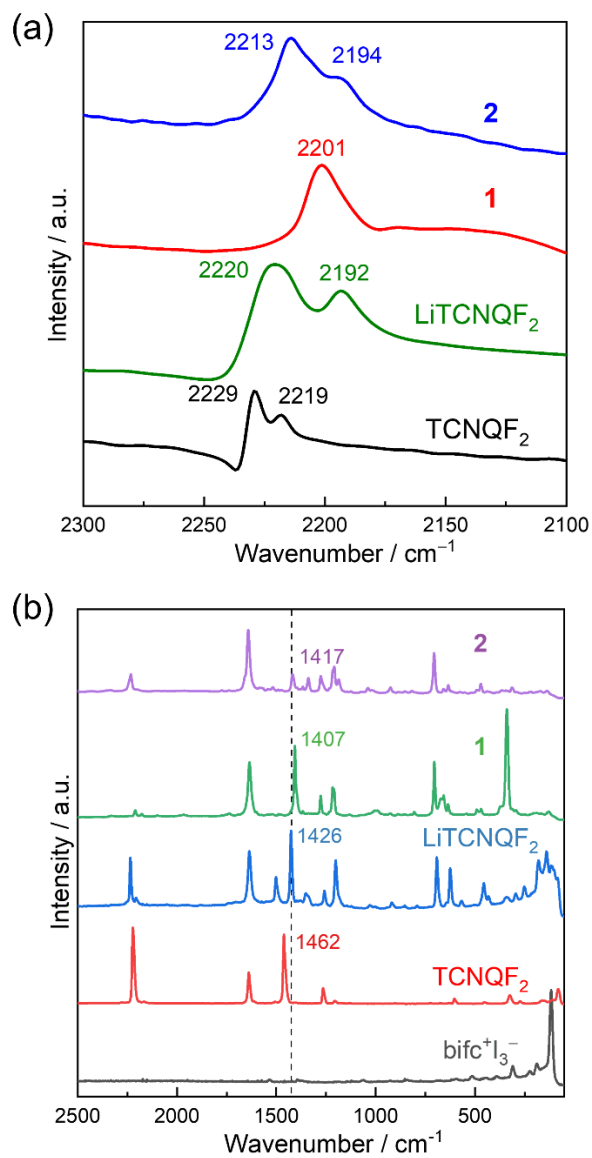

**Figure S6.** Infrared (a) and Raman (b) spectra of **1**, **2**, TCNQF<sub>2</sub>, LiTCNQF<sub>2</sub>, and biferrocene<sup>+</sup>I<sub>3</sub><sup>-</sup> measured at room temperature.,

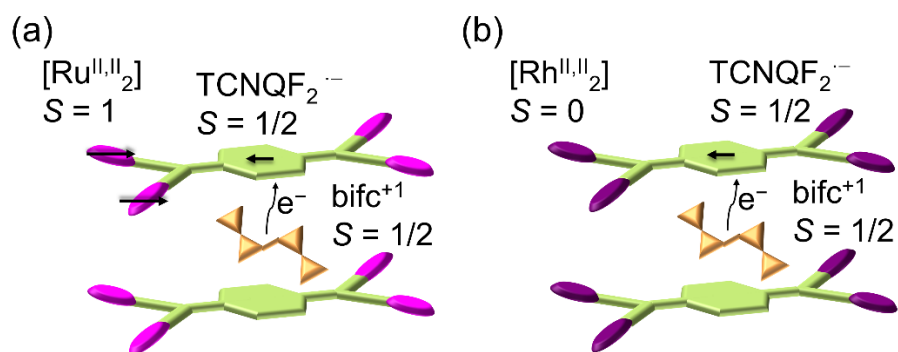

**Figure S7.** Electronic and spin states of assembly units and charge transfer in compounds **1** (left) and **2** (right).  $[\text{Ru}_2^{\text{II,II}}(2,3,5,6\text{-F}_4\text{ArCO}_2)_4]$ , pink;  $[\text{Rh}_2^{\text{II,II}}(2,3,5,6\text{-F}_4\text{ArCO}_2)_4]$ , purple;  $\text{TCNQF}_2^{\cdot-}$ , green;  $\text{bifc}^+$ , orange.

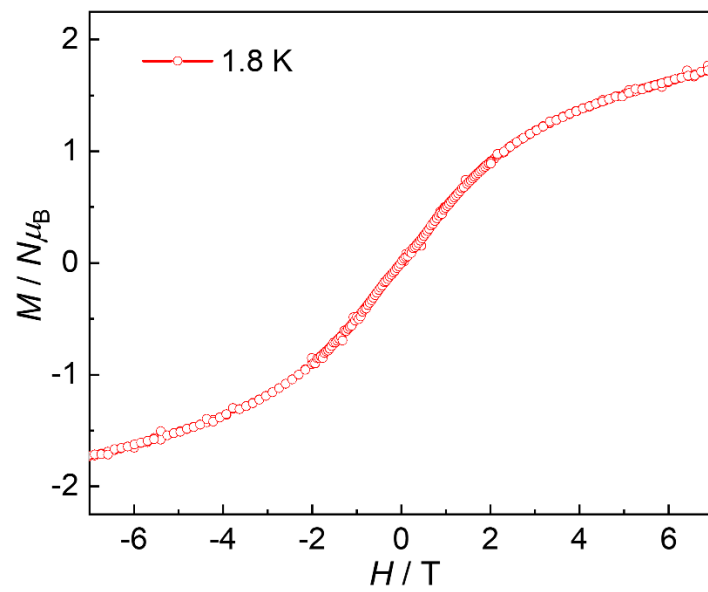

**Figure S8.** Magnetic field dependence of magnetization at 1.8 K of 2.

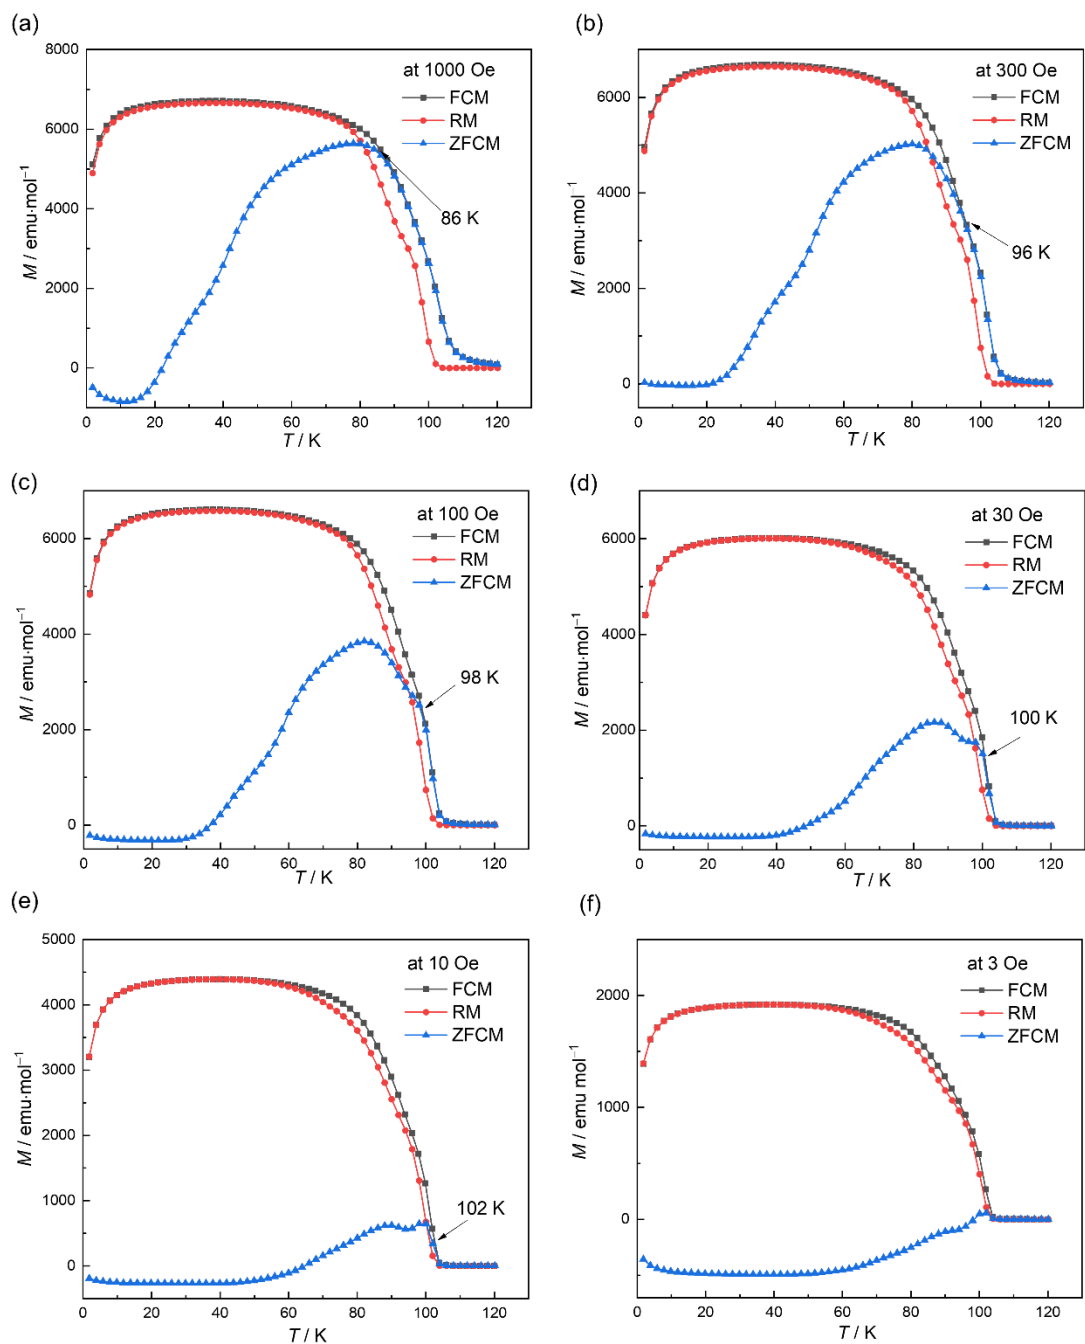

**Figure S9.** Field-cooled magnetization (FCM), zero-field-cooled magnetization (ZFCM), and remnant magnetization (RM) curves **1** measured from 120 K to 1.8 K under different dc fields. The diverged point of ZFCM and FCM curves (black arrow) showed the obvious shift.

## Relaxation time analysis of spin glass behavior using Arrhénius law and the critical scaling model.

From the Figure 4a, we can see that  $\chi''$  is significantly frequency dependent. Frequency-dependent slow relaxation behavior of the magnetization is usually observed in spin-glass, superparamagnetic, or long-range ordering systems. In order to confirm the relaxation behaviors in **1**, dynamic slowing analysis is necessary.

The critical scaling approach is a good model to analyze frequency dependence of freezing temperature in spin-glass systems,  $\tau = \tau_0 \cdot \left[\frac{T_B}{T_{SG}} - 1\right]^{-z\nu}$  ( $T_{SG}$  is the spin glass temperature when  $f$  is equal to zero,  $z\nu$  is the dynamic critical exponent and  $T_B$  was defined as the value at the maximum point of relaxation peaks in  $\chi''-T$  plot after multiple peak fit with Gauss function in Origin Pro2018.<sup>20</sup> The peak separation results are shown in Figure S9 and Table S7. Here, positions of fit peak 1 were almost unchanged, while fit peak 2 and 3 shifted to higher temperature with the increasing frequency. The fitting result gives reasonable parameters (Figure 4b), that is,  $\tau_0$ ,  $z\nu$  and  $T_{SG}$  are  $2.6 \times 10^{-14}$  s, 7.1, and 91.9 K for 1<sup>st</sup> and  $2.7 \times 10^{-9}$  s, 6.9, and 73.6 K for 2<sup>nd</sup> relaxation, respectively. From this analysis, the value of  $z\nu$  is in the typical range of a spin glass system between 4 and 12.<sup>21</sup> The  $\tau_0$  order of magnitude of 1<sup>st</sup> is larger than canonical spin glass ( $10^{-12}$ – $10^{-13}$ ),<sup>22,23</sup> but it is close to the spin cluster-glass behavior.<sup>11</sup> Generally, the reasonable fitting results suggest that both relaxation behaviors below 95 K in ac susceptibility are ascribed to spin-glass characterized relaxation.

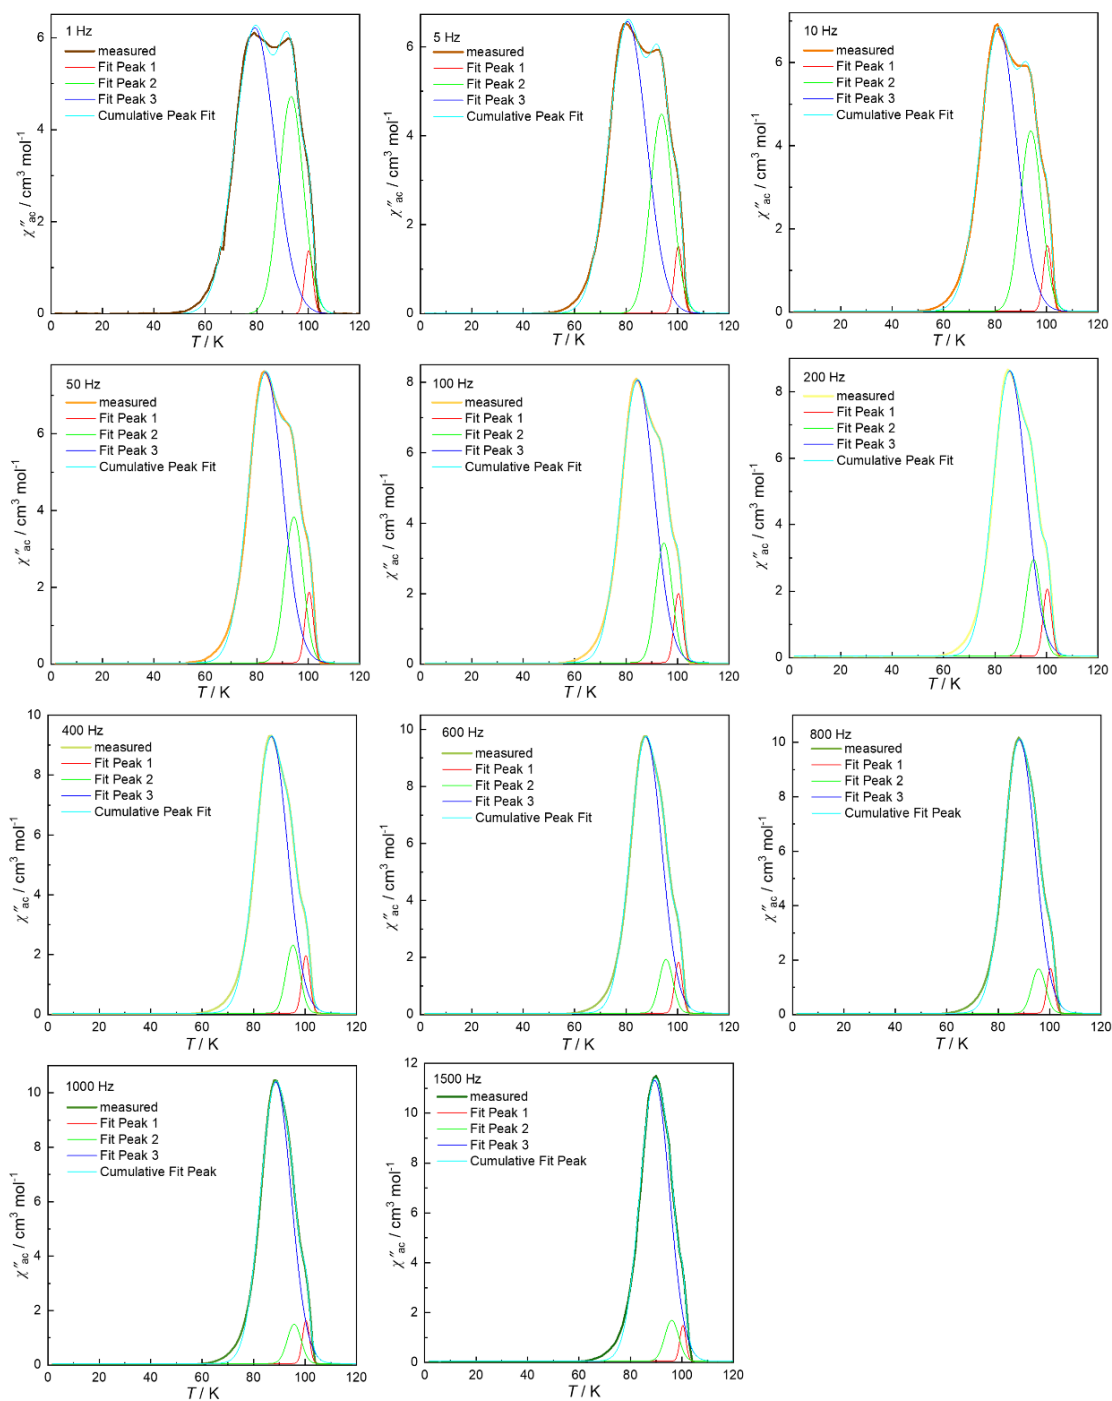

**Figure S10.** Multiple peak fit results of  $\chi''$  at different frequency with Gauss function using Origin Pro 2018.

**Table S7.**  $\chi''$  peak positions of fit peaks after separation with Gauss function.

| Frequency /<br>Hz | Positon of fit peak 1 / K | Positon of fit peak 2 / K | Positon of fit peak 3 / K |
|-------------------|---------------------------|---------------------------|---------------------------|
| 1                 | 100.2097(0.12466)         | 93.38435(0.15362)         | 79.22829(0.21492)         |
| 5                 | 100.33862(0.09778)        | 93.79749(0.12041)         | 80.60765(0.16164)         |
| 10                | 100.36099(0.10042)        | 93.95487(0.12311)         | 81.30005(0.15651)         |
| 50                | 100.37244(0.11869)        | 94.46278(0.14218)         | 83.41586(0.15357)         |
| 100               | 100.34956(0.13849)        | 94.71234(0.16486)         | 84.48457(0.15148)         |
| 200               | 100.33933(0.16261)        | 95.01077(0.20347)         | 85.69213(0.15425)         |
| 400               | 100.33255(0.18557)        | 95.33041(0.26834)         | 86.956(0.16159)           |
| 600               | 100.34391(0.20103)        | 95.53876(0.34148)         | 87.7146(0.17328)          |
| 800               | 100.36891(0.20768)        | 95.71389(0.42198)         | 88.25271(0.19042)         |
| 1000              | 100.35502(0.21674)        | 95.78558(0.51374)         | 88.65838(0.2078)          |
| 1500              | 100.38836(0)              | 96.05628(0.44246)         | 89.42474(0.22595)         |

## Stepwise relaxation behavior in 1.

For the one-electron-transferred layered D<sub>2</sub>A-MOFs, their magnetic ground are related to the interunit distance between layers, translational distance ( $l_T$ ). The AF/F boundary is determined at approximately  $l_T = 10.3 \text{ \AA}$ :  $l_T > 10.3 \text{ \AA}$  for ferromagnetic phase and  $l_T < 10.3 \text{ \AA}$  for antiferromagnetic phase.<sup>24,25</sup> Based on this rule, the closer interlayer distance will induce AF. The hypothesis of easy axis perpendicular to D<sub>2</sub>A layer conflict the molecule dipole-dipole interaction, that is, same charge will repel. Therefore, their easy axis of magnetic anisotropy should be along the layer.

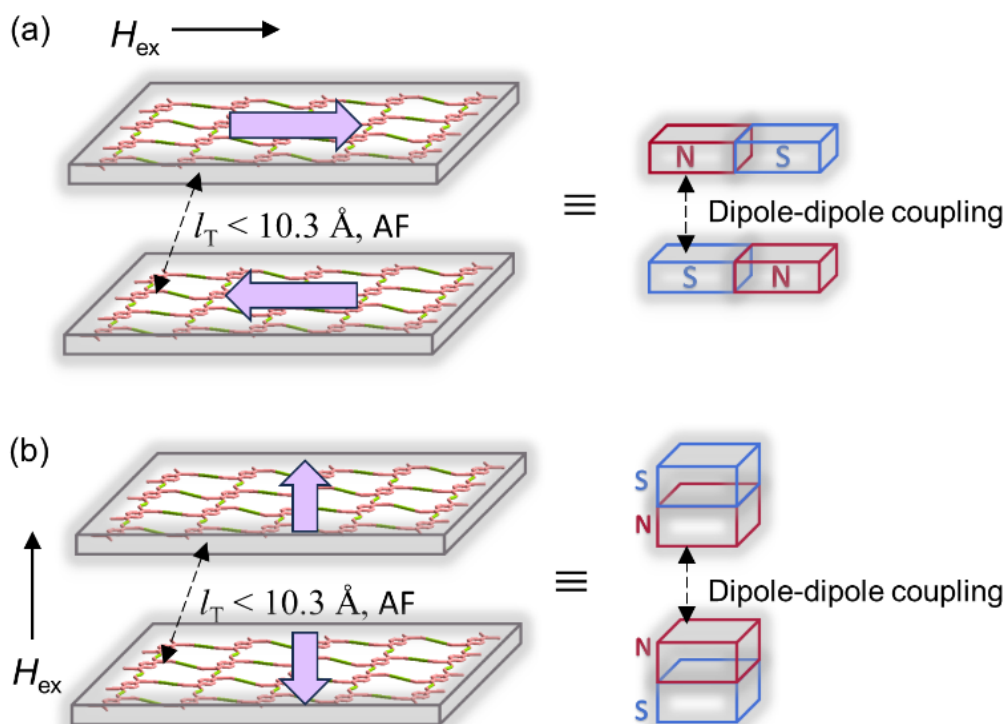

**Figure S11.** Schematic representations of spin alignments in the two-dimensional one-electron-transferred D<sub>2</sub>A-typed antiferromagnetic phase: spin orientation is parallel (a) or perpendicular (b) to the fishnet layer.



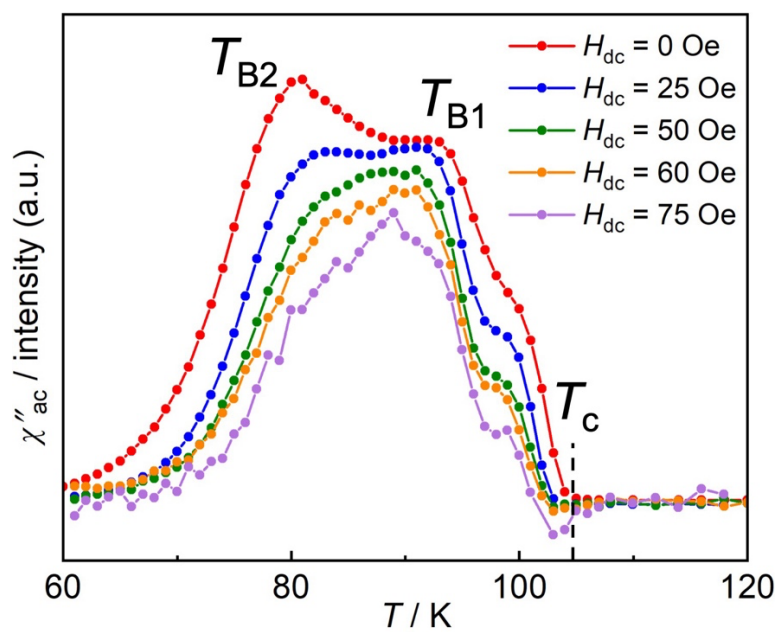

**Figure S12.** Temperature dependence of the AC magnetic susceptibility (out of phase) of **1** measured under several external DC fields with a 3 Oe oscillating field at a fixed frequency of 10 Hz.

## References in SI

---

- 1 Y. Inagaki and M. Naya, European Patent EP1130585, 2001.
- 2 H. Miyasaka, N. Motokawa, R. Atsuumi, H. Kamo, Y. Asai and M. Yamashita, *Dalton Trans.*, 2011, **40**, 673-682.
- 3 G. A. Rempel, P. Legzdins, H. Smith and G. Wilikson, in *Inorganic Syntheses*, ed. F. A. Cotton, McGraw-Hill, Inc., New York, 1972, vol. 13, pp. 90-91.
- 4 W. H. Morrison and D. N. Hendrickson, *Inorg. Chem.* 1975, **14**, 2331-2346.
- 5 M. D. Rausch, *The Journal of Organic Chemistry*, 1961, **26**, 1802-1805.
- 6 K.-J. Chen, A. C. Tan, C.-H. Wang, T.-S. Kuo, P.-L. Chen and M. Horie, *Cryst. Growth Des.*, 2019, **19**, 17-22.
- 7 G. A. Bain,; J. F. Berry, , Diamagnetic Corrections and Pascal's Constants. *J. Chem. Educ.* 2008, **85**, 532.
- 8 O. V. Dolomanov, L. J. Bourhis, R. J. Gildea, J. A. Howard and H. Puschmann, *J. Appl. Crystallogr.*, 2009, **42**, 339-341.
- 9 G. Sheldrick, *Acta Crystallographica Section A*, 2008, **64**, 112-122.
- 10 G. Sheldrick, *Acta Cryst.*, 2015, **71**, 3-8.
- 11 H. Putz and K. Brandenburg GbR, DIAMOND, Bonn, Germany, 2019.
- 12 S. Furukawa and S. Kitagawa, *Inorg. Chem.*, 2004, **43**, 6464-6472.
- 13 F. A. Cotton and R. A. Walton, *Multiple Bonds Between Metal Atoms*, 2nd ed.; Oxford University Press: Oxford, 1993.
- 14 T. J. Kistenmacher, T. J. Emge, A. Bloch and D. Cowan, *Acta Crystallographica Section B: Structural Crystallography and Crystal Chemistry*, 1982, **38**, 1193-1199.
- 15 R. E. Long, R. A. Sparks and K. N. Trueblood, *Acta Crystallographica*, 1965, **18**, 932-939.
- 16 A. Hoekstra, T. Spoelder and A. Vos, *Acta Crystallographica Section B: Structural Crystallography and Crystal Chemistry*, 1972, **28**, 14-25.
- 17 W. Kosaka, Y. Takahashi, M. Nishio, K. Narushima, H. Fukunaga and H. Miyasaka, *Adv. Sci.*, 2018, **5**, 1700526.
- 18 H. Fukunaga and H. Miyasaka, *Angew. Chem.*, 2015, **127**, 579-583.
- 19 H. Fukunaga, W. Kosaka, H. Nemoto, K. Taniguchi, S. Kawaguchi, K. Sugimoto and H. Miyasaka, *Chem. Eur. J.*, 2020, **26**, 16755-16766.
- 20 Origin(Pro), Version 2018. OriginLab Corporation, Northampton, MA, USA.
- 21 V. K. Anand, D. T. Adroja and A. D. Hillier, *Phys. Rev. B*, 2012, **85**, 014418.
- 22 J. Kroder, J. Gooth, W. Schnelle, G. H. Fecher and C. Felser, *AIP Advances*, 2019, **9**, 055327.
- 23 S. Pakhira, C. Mazumdar, R. Ranganathan, S. Giri and M. Avdeev, *Phys. Rev. B*, 2016, **94**, 104414.
- 24 H. Miyasaka, *Bull. Chem. Soc. Jpn.*, 2021, **94**, 2929-2955.
- 25 W. Kosaka, Z. Liu and H. Miyasaka, *Dalton Trans.*, 2018, **47**, 11760-11768.
